# Supplementary material for: Coverage-dependent bias creates the appearance of binary splicing in single cells
Source: eLife journal article supplement (doi:10.7554/elife.54603), 2020-06-29
Supplement: supp [file elife-54603-supp-v1.zip]

Archive with 8 entries (8 files):
- elife_poa_e54603_Transparent_Reporting_File.pdf
- elife_poa_e54603_Figure_2_figure_supplement_1.pdf
- elife_poa_e54603_Figure_3_figure_supplement_1.pdf
- elife_poa_e54603_Figure_3_figure_supplement_2.pdf
- elife_poa_e54603_Figure_4_figure_supplement_1.pdf
- elife_poa_e54603_Figure_4_figure_supplement_2.pdf
- elife_poa_e54603_Figure_4_figure_supplement_3.pdf
- elife_poa_e54603_Figure_4_figure_supplement_4.pdf
