# Supplementary material for: Coverage-dependent bias creates the appearance of binary splicing in single cells
Source: eLife journal article supplement (doi:10.7554/elife.54603), 2020-06-29
Supplement: supp [file elife-54603-supp-v1.zip › elife_poa_e54603_Figure_3_figure_supplement_2.pdf]

Splicing model  
(bimodal, unimodal)

Gene expression

Underlying  $\Psi$

Total mRNA

Intrinsic  
variation

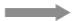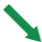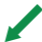

Splicing

Isoform mRNA  
(Exon spliced-in, skipped)

Capture  
efficiency

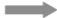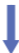

Library  
preparation

Captured mRNA

Sequencing  
variation

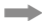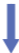

Sequencing,  
SJ coverage

Splice junction reads
