# Supplementary figures and images for: Coverage-dependent bias creates the appearance of binary splicing in single cells
Source: eLife journal article supplement (doi:10.7554/elife.54603), 2020-06-29

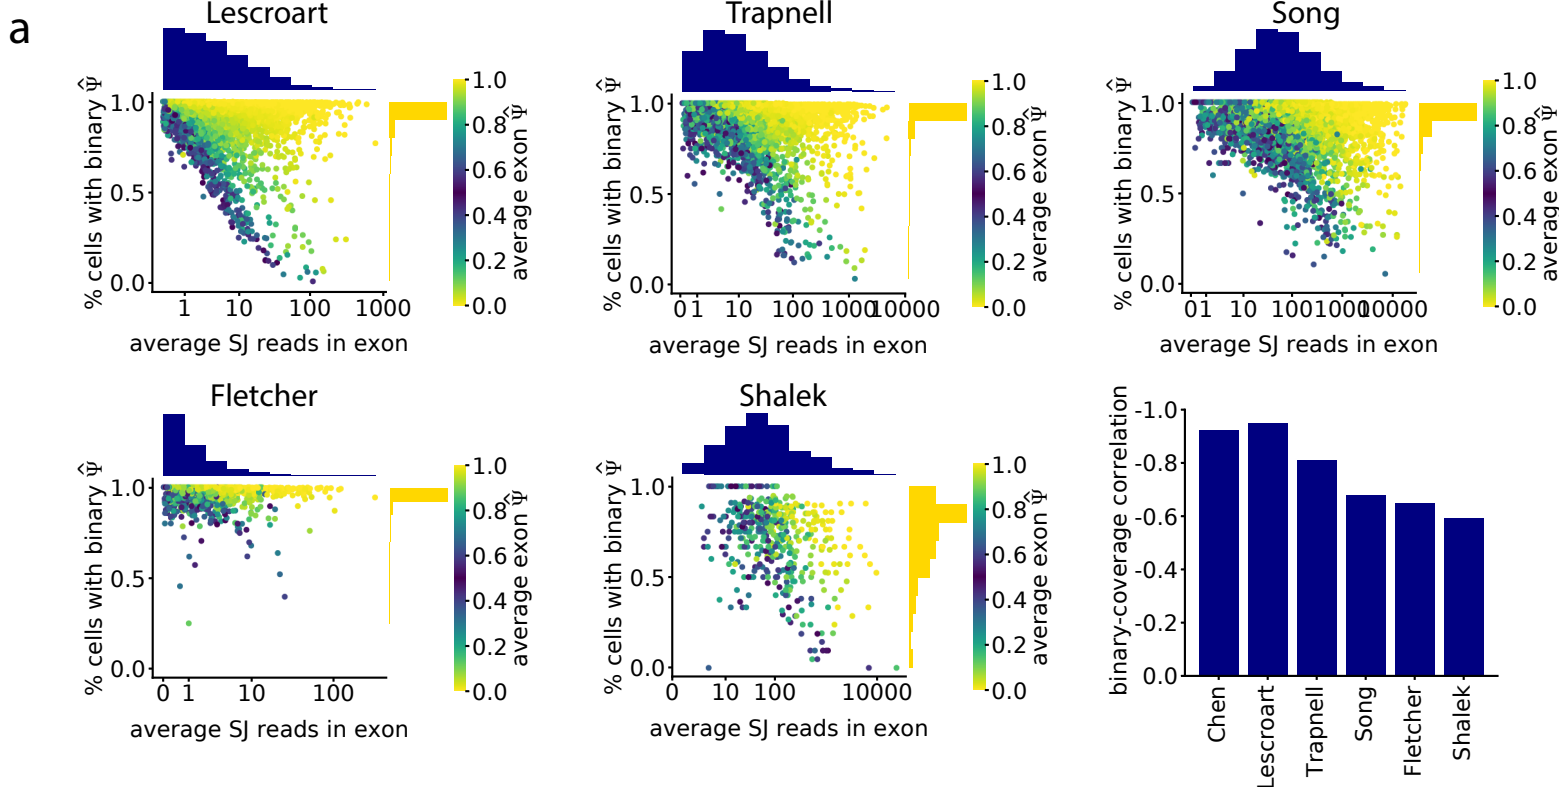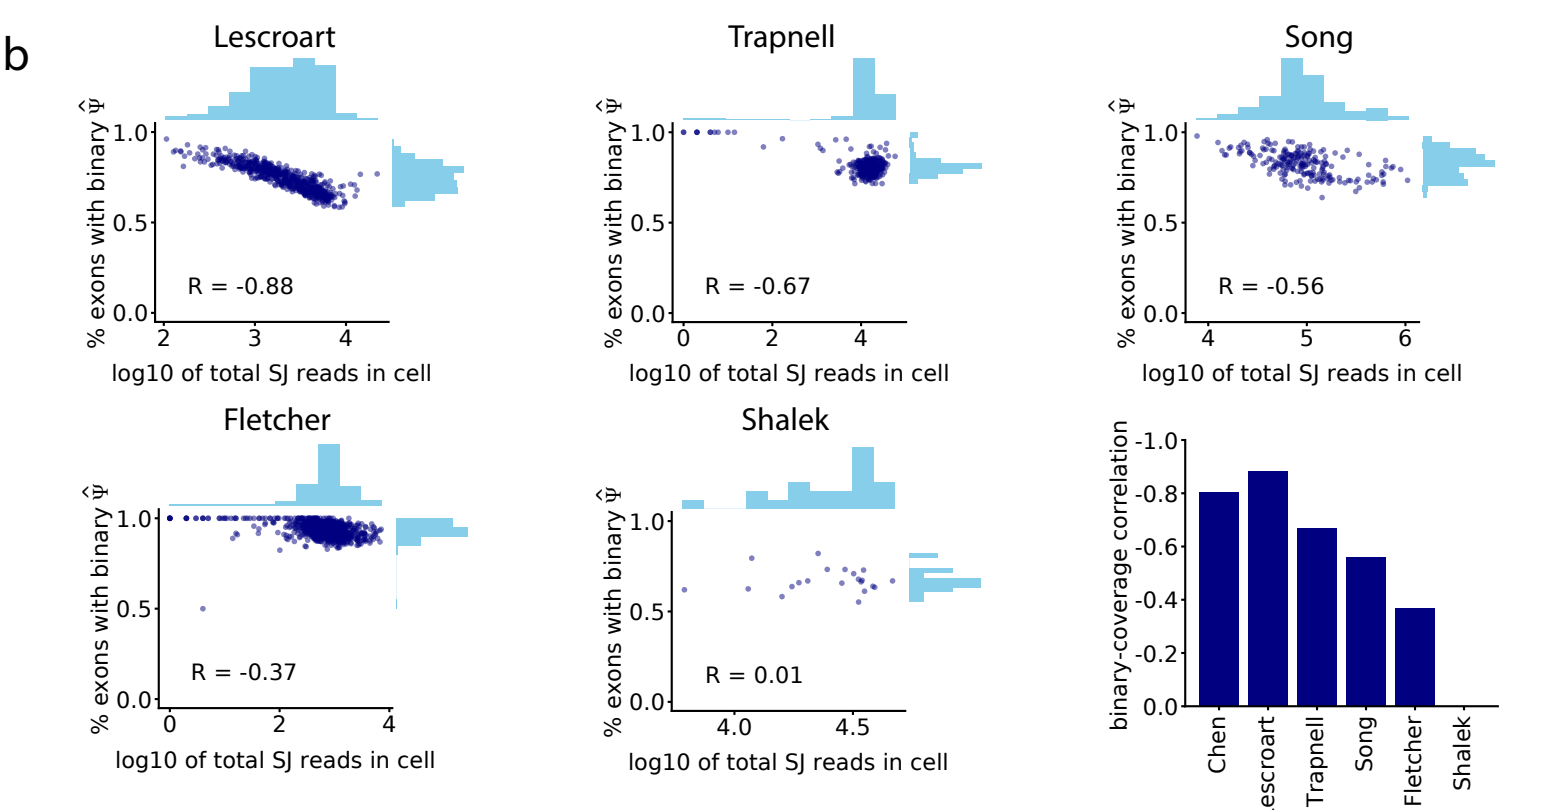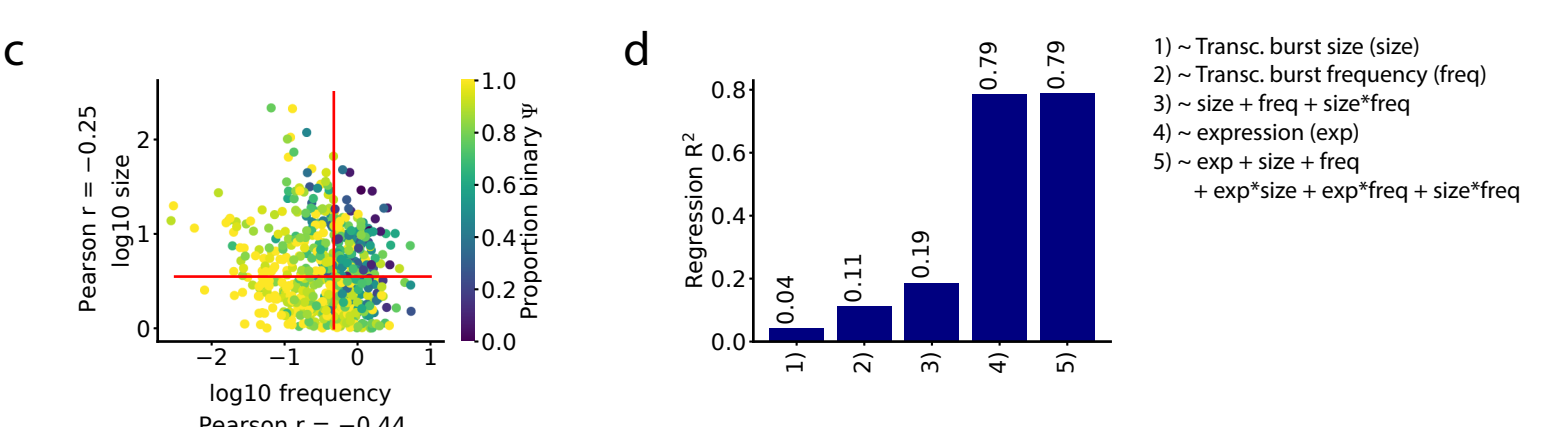

Supplement: supp [file elife-54603-supp-v1.zip › elife_poa_e54603_Figure_2_figure_supplement_1.pdf]

**a**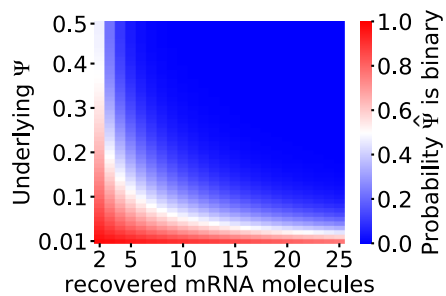**b**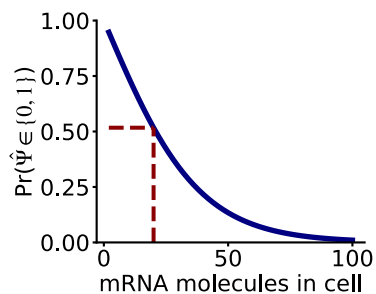**c**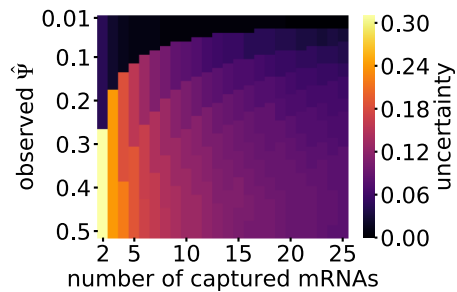**d**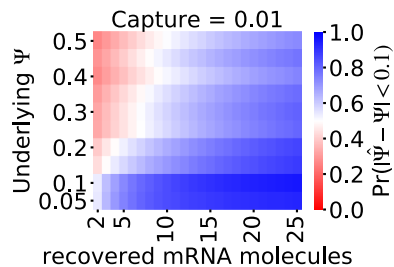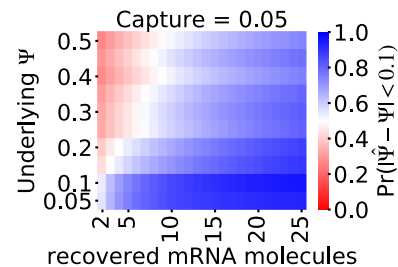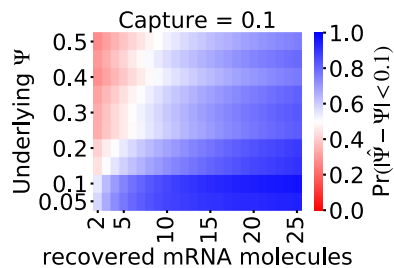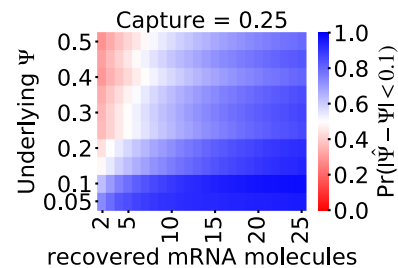**e**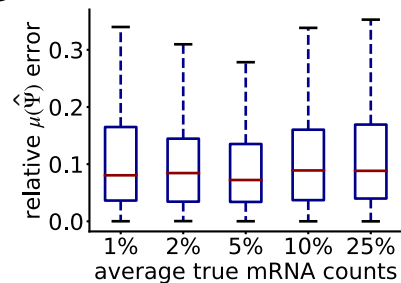**f**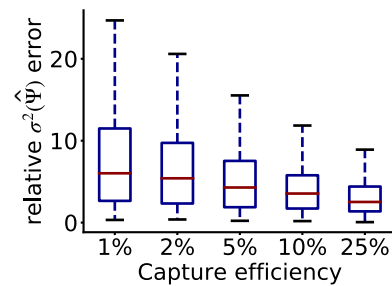

Supplement: supp [file elife-54603-supp-v1.zip › elife_poa_e54603_Figure_3_figure_supplement_1.pdf]

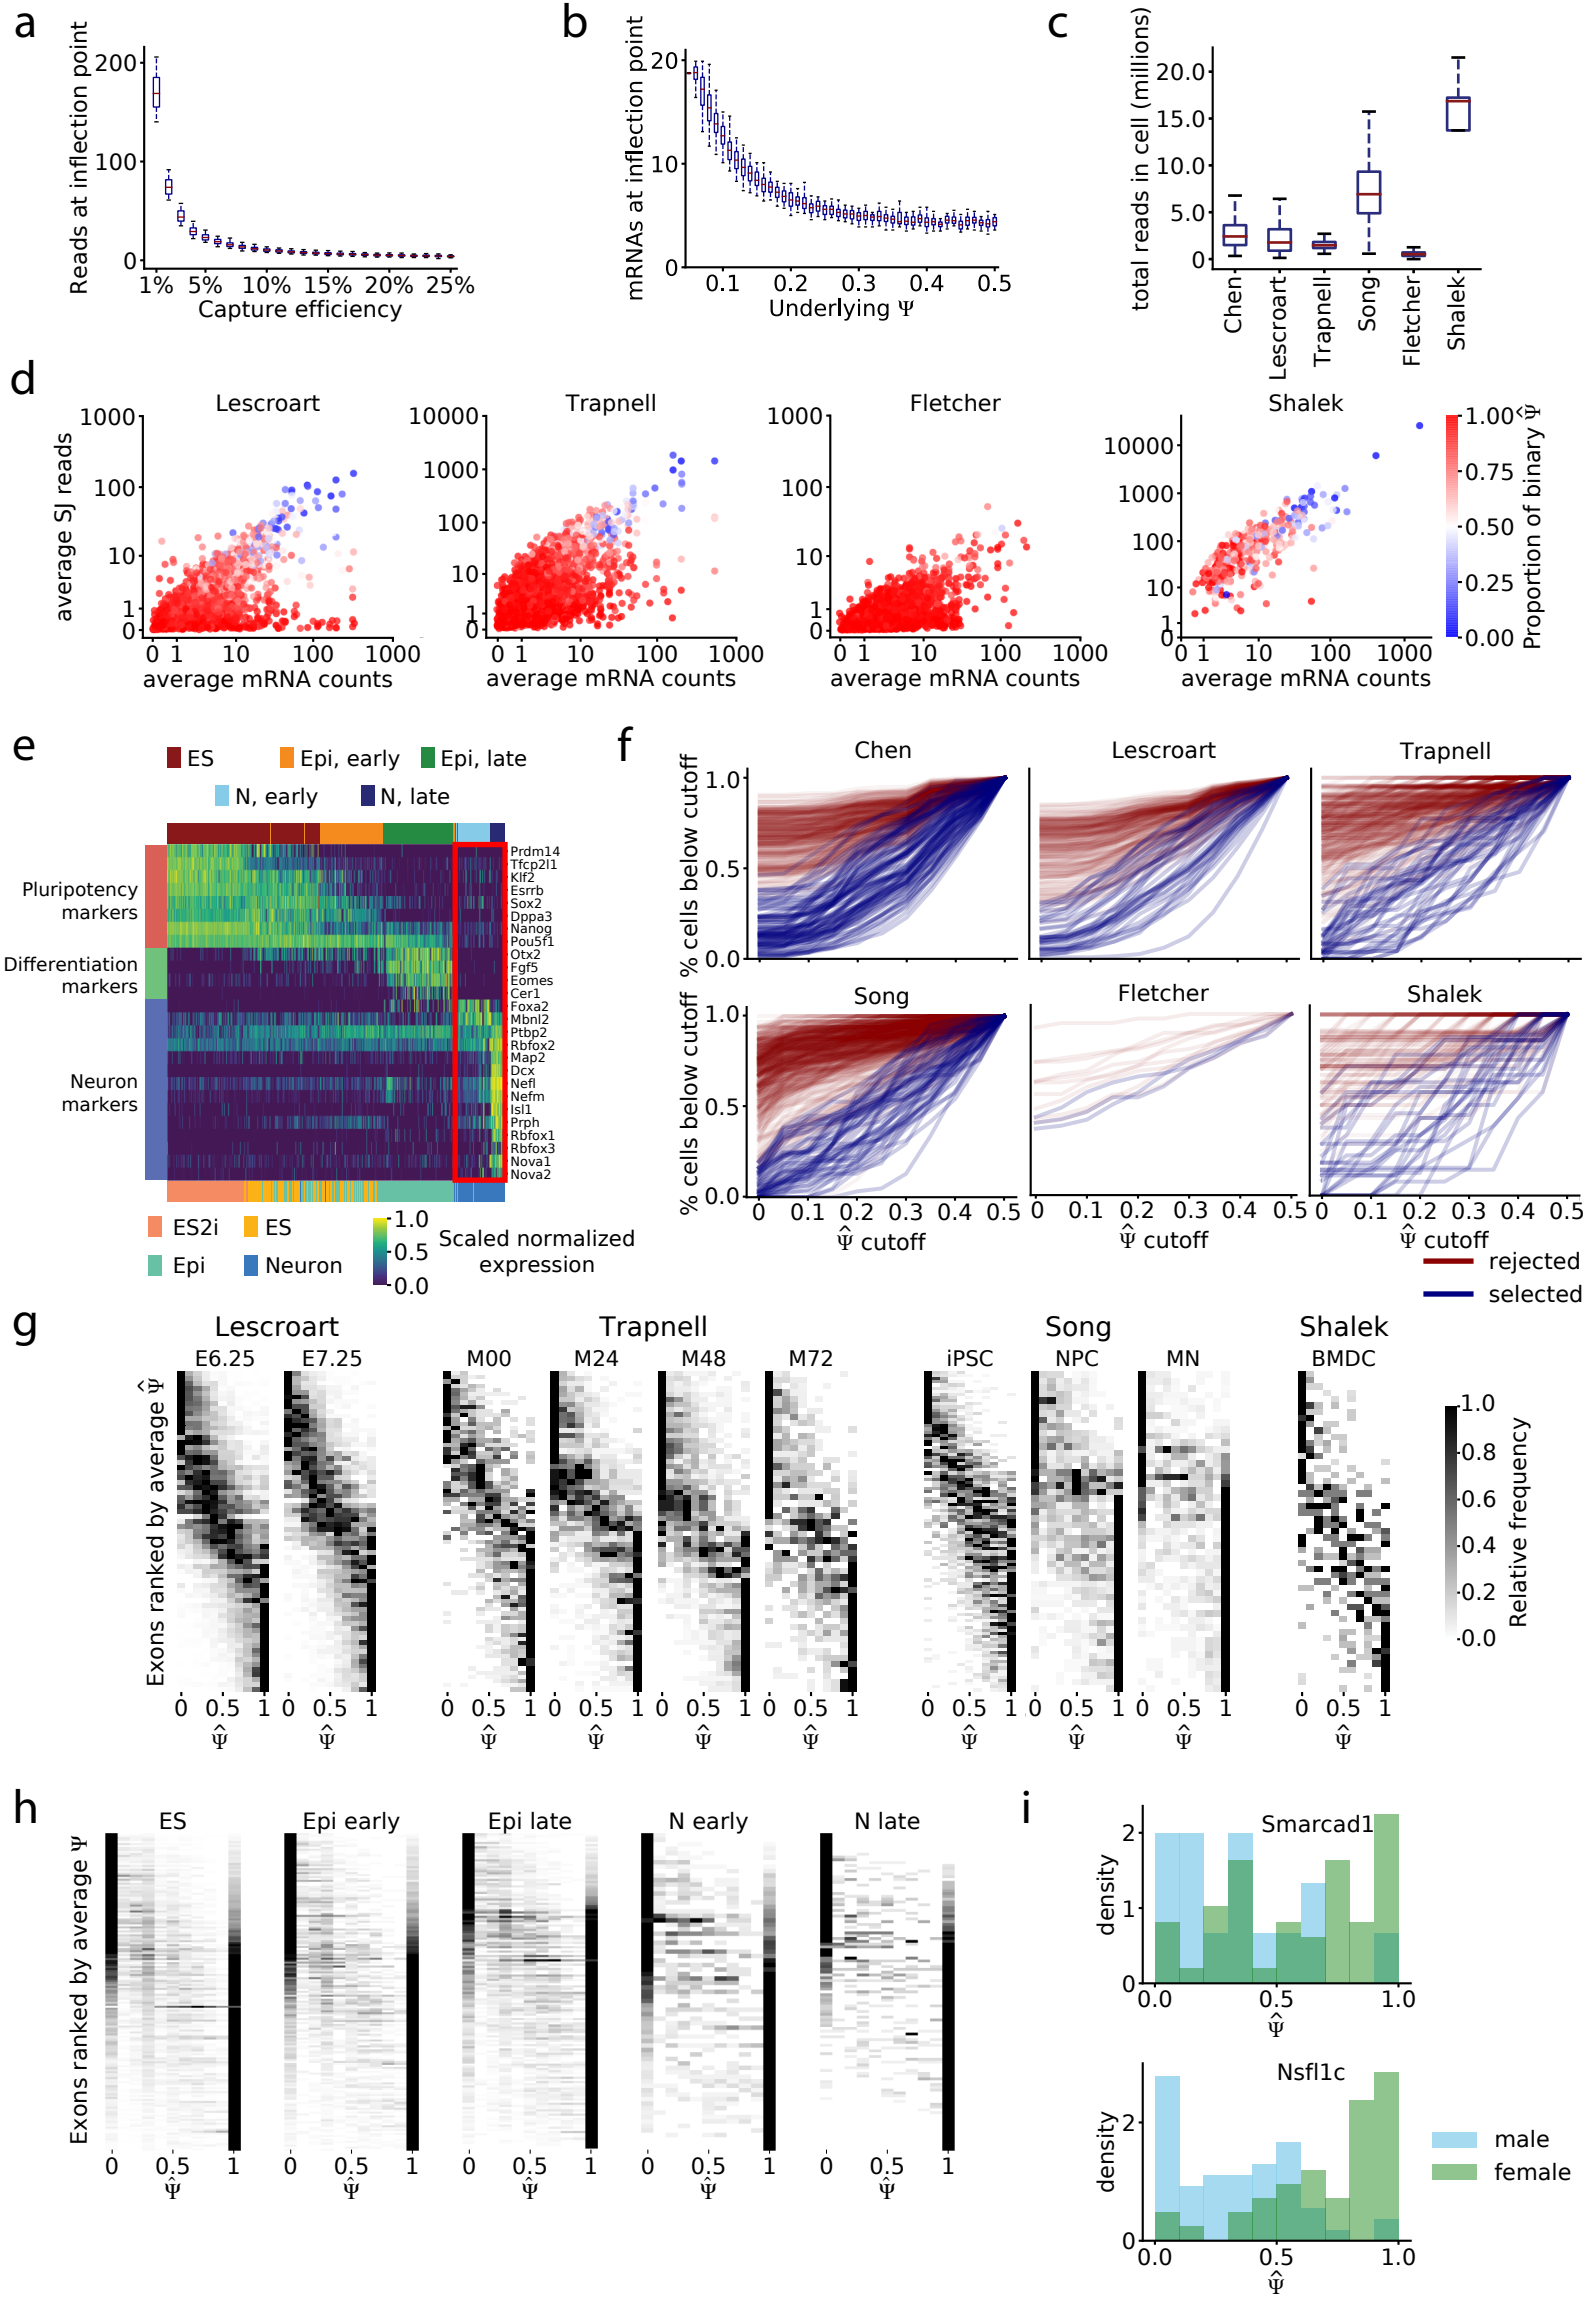

Supplement: supp [file elife-54603-supp-v1.zip › elife_poa_e54603_Figure_4_figure_supplement_1.pdf]

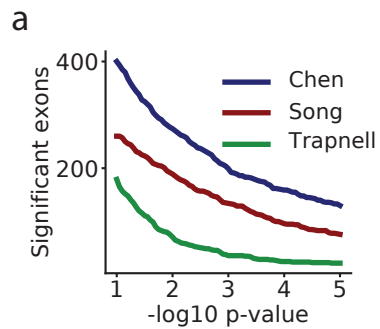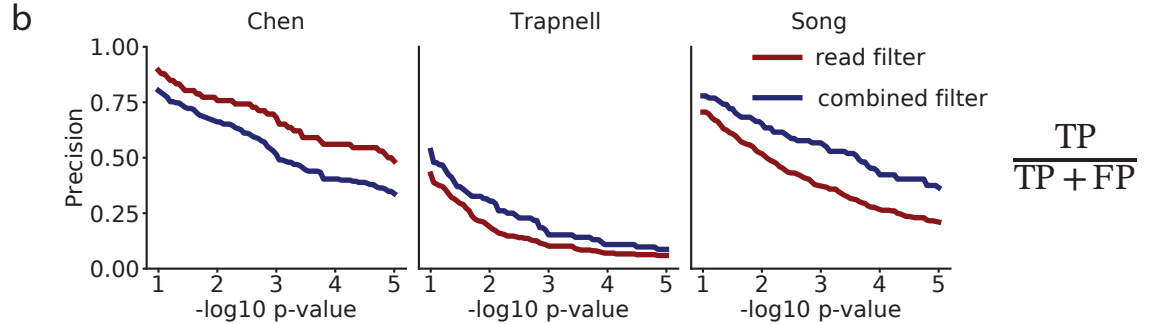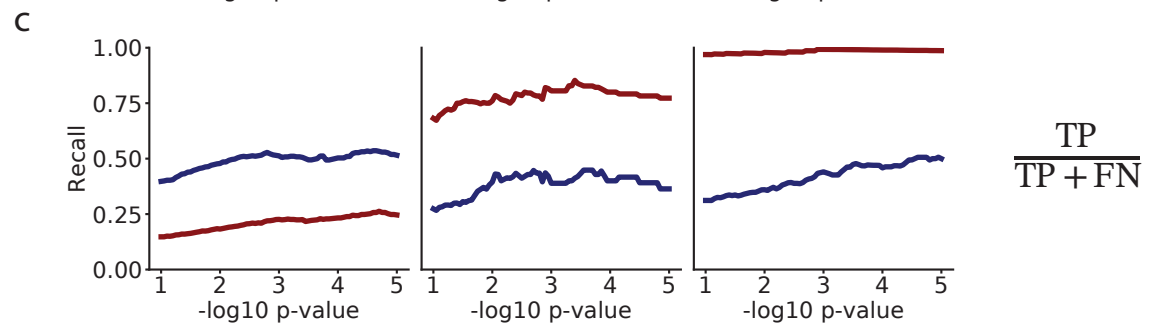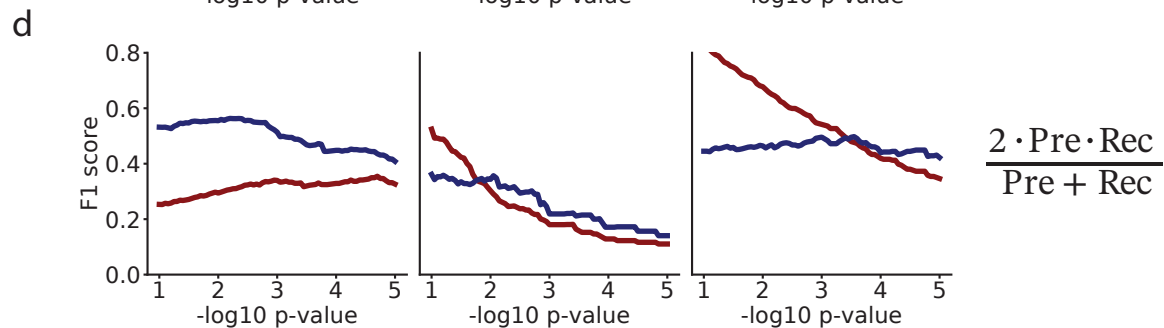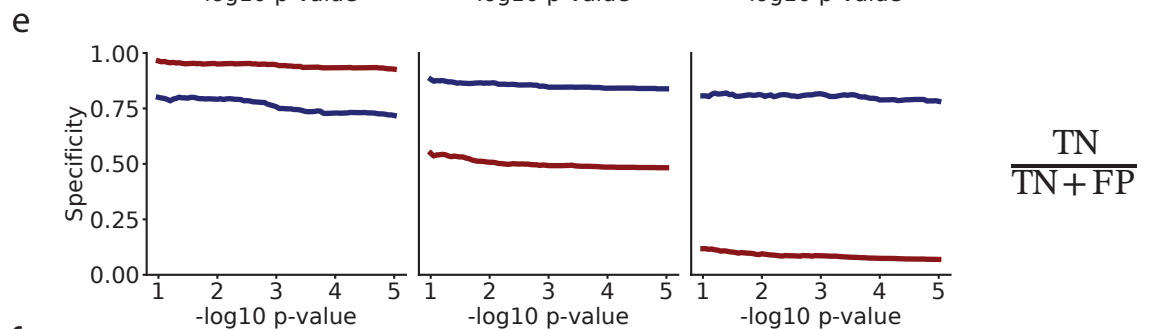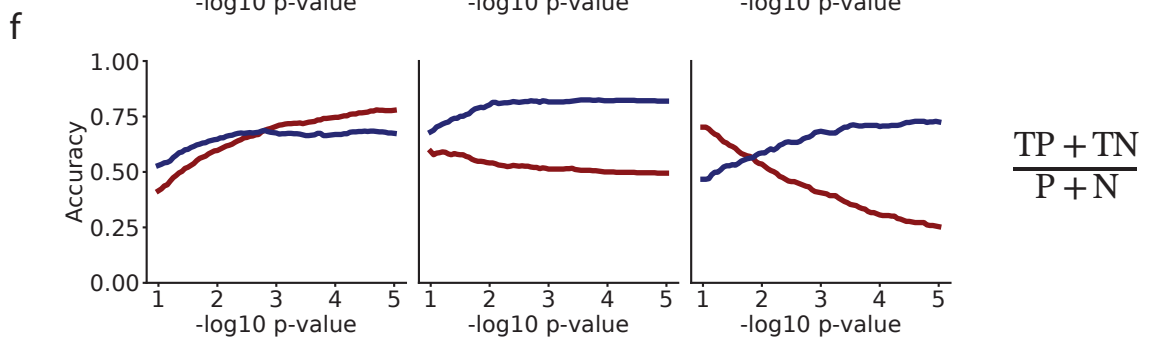

Supplement: supp [file elife-54603-supp-v1.zip › elife_poa_e54603_Figure_4_figure_supplement_2.pdf]

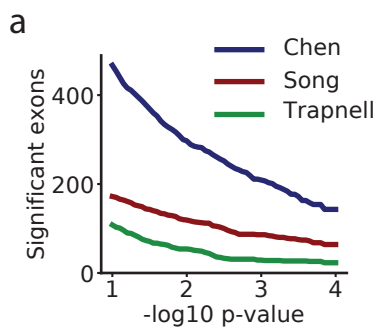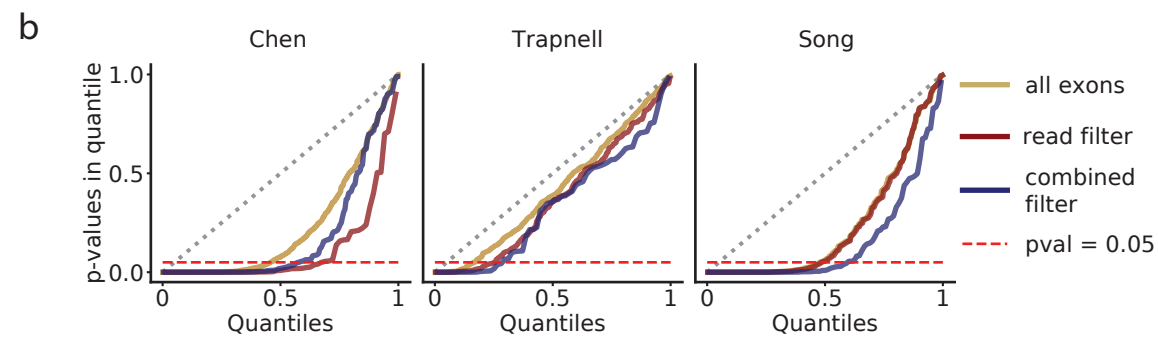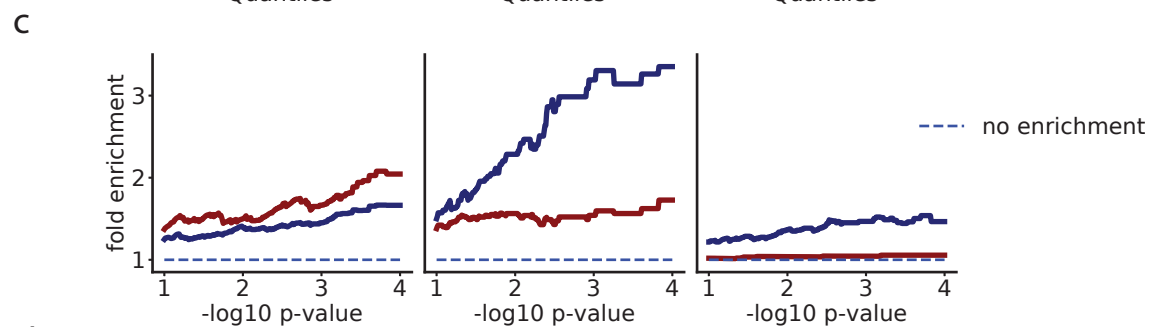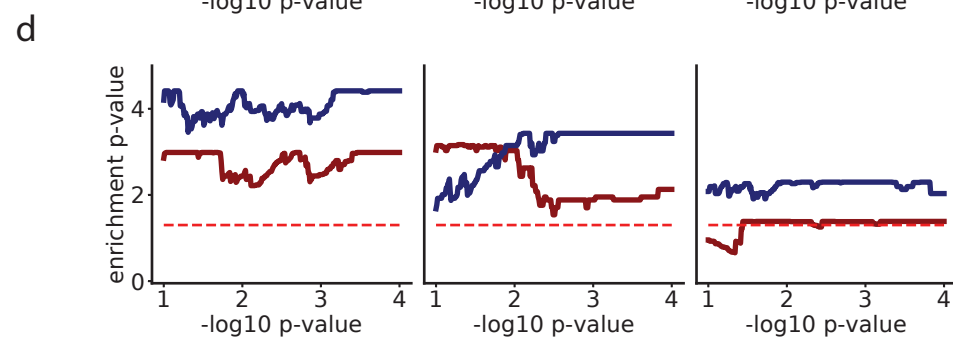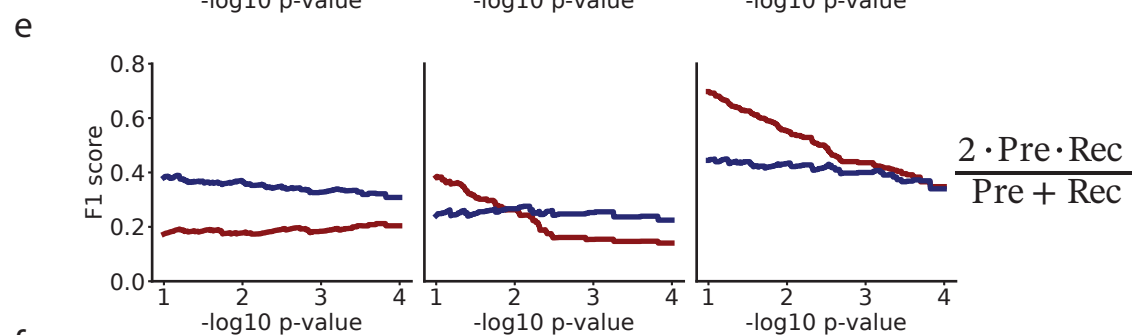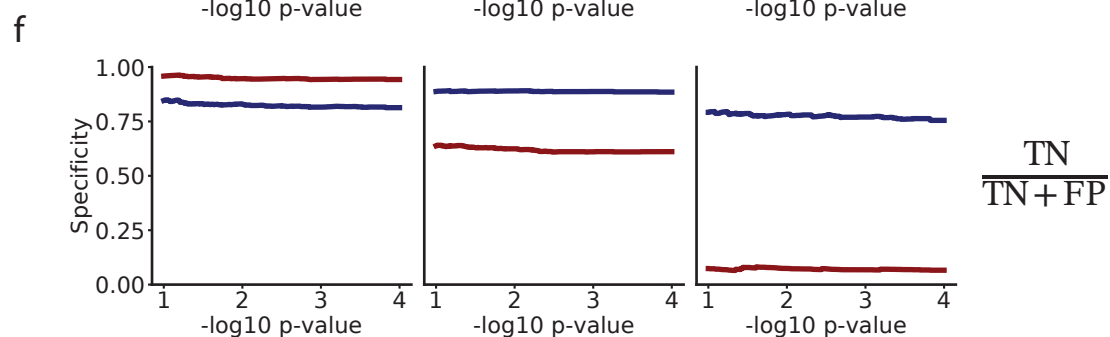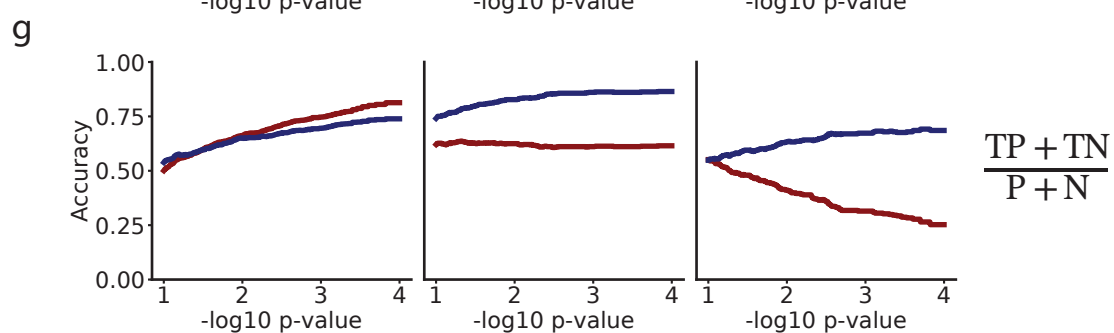

Supplement: supp [file elife-54603-supp-v1.zip › elife_poa_e54603_Figure_4_figure_supplement_3.pdf]

a

Cadm1

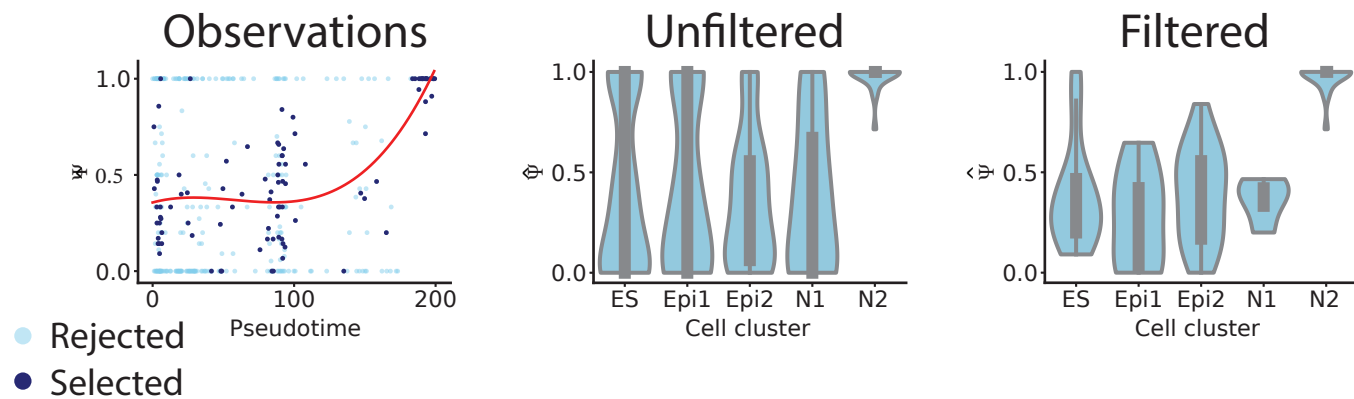

b

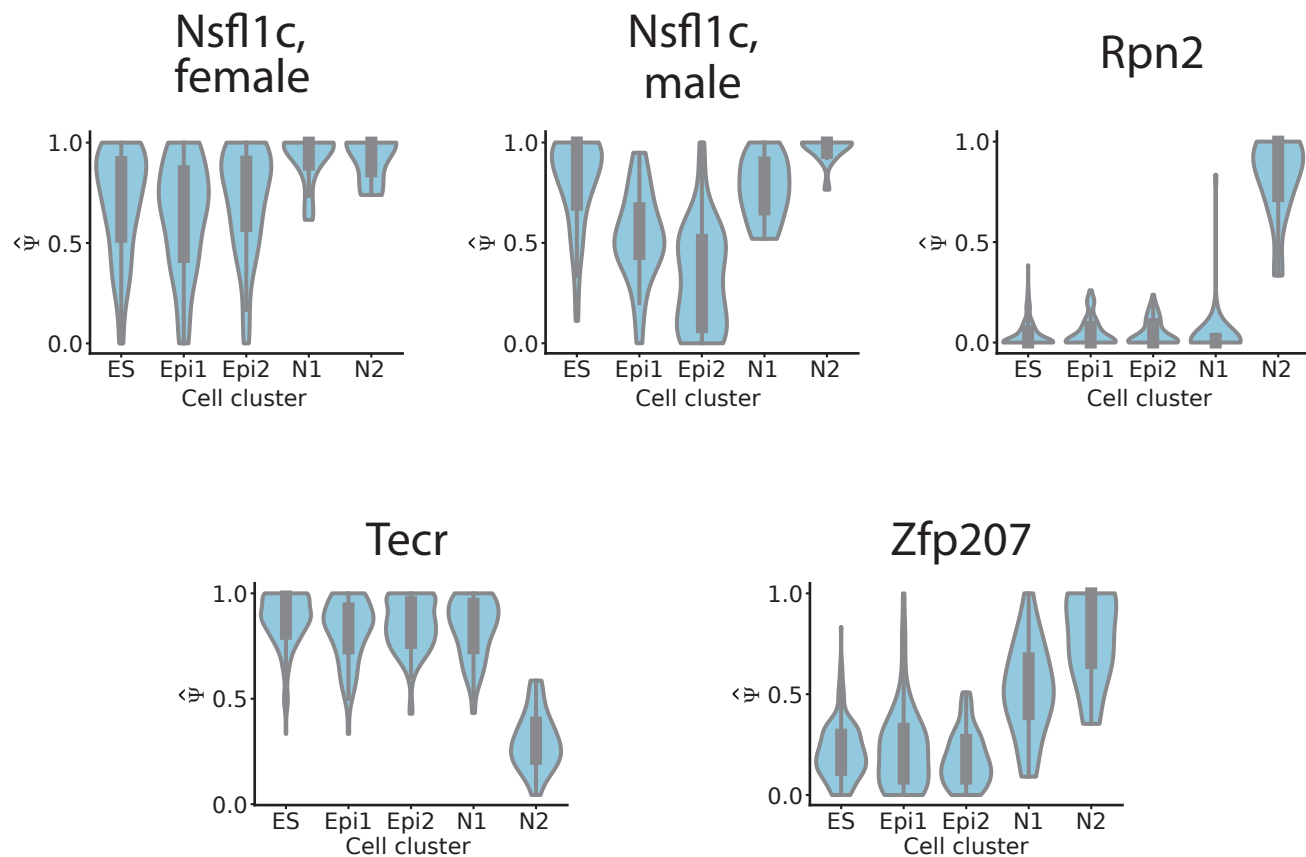

Supplement: supp [file elife-54603-supp-v1.zip › elife_poa_e54603_Figure_4_figure_supplement_4.pdf]
